# Supplementary material for: SF-066-4 線維芽細胞+血管内皮前駆細胞共培養シートを用いた新たな膵断端処理法の開発(膵-2,サージカルフォーラム,第110回日本外科学会定期学術集会)
Source: Copernicus journal article supplement (doi:10.5194/aab-63-155-2020), 2010-03-05
Supplement: Supplementary file 2 [file aab-63-155-2020-supplement.zip]

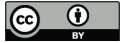

## *Supplement of*

# **Screening the key genes of hair follicle growth cycle in Inner Mongolian Cashmere goat based on RNA sequencing**

**Rui Su et al.**

*Correspondence to:* Jinquan Li (lijinquan\_nd@126.com)

- aab-63-155-2020-supplement-title-page.pdf
- supplement files
  - GO anagen to catagen.pdf
  - GO catagen to telogen.pdf
  - GO telogen to anagen.pdf

The copyright of individual parts of the supplement might differ from the CC BY 4.0 License.
