# Supplementary material for: SF-066-4 線維芽細胞+血管内皮前駆細胞共培養シートを用いた新たな膵断端処理法の開発(膵-2,サージカルフォーラム,第110回日本外科学会定期学術集会)
Source: Copernicus journal article supplement (doi:10.5194/aab-63-155-2020), 2010-03-05

The Most Enriched GO Terms ( telogen to anagen )  
Biological Process

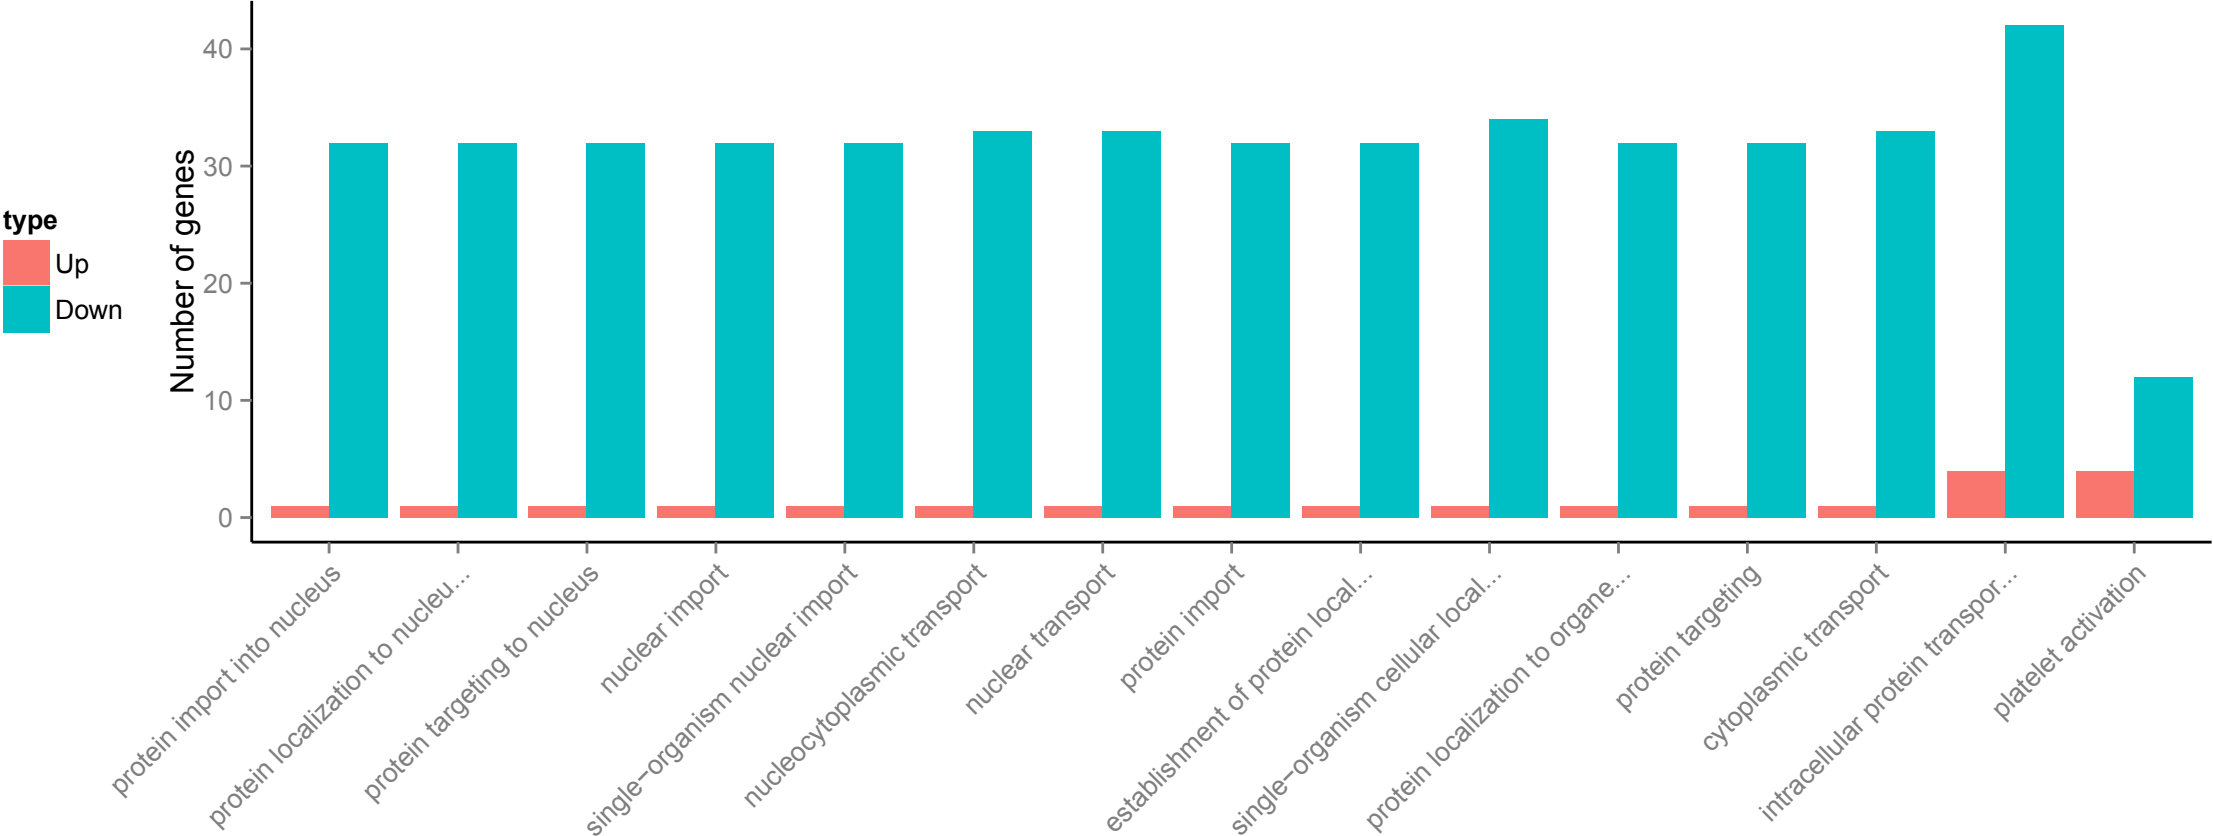

Cellular Component

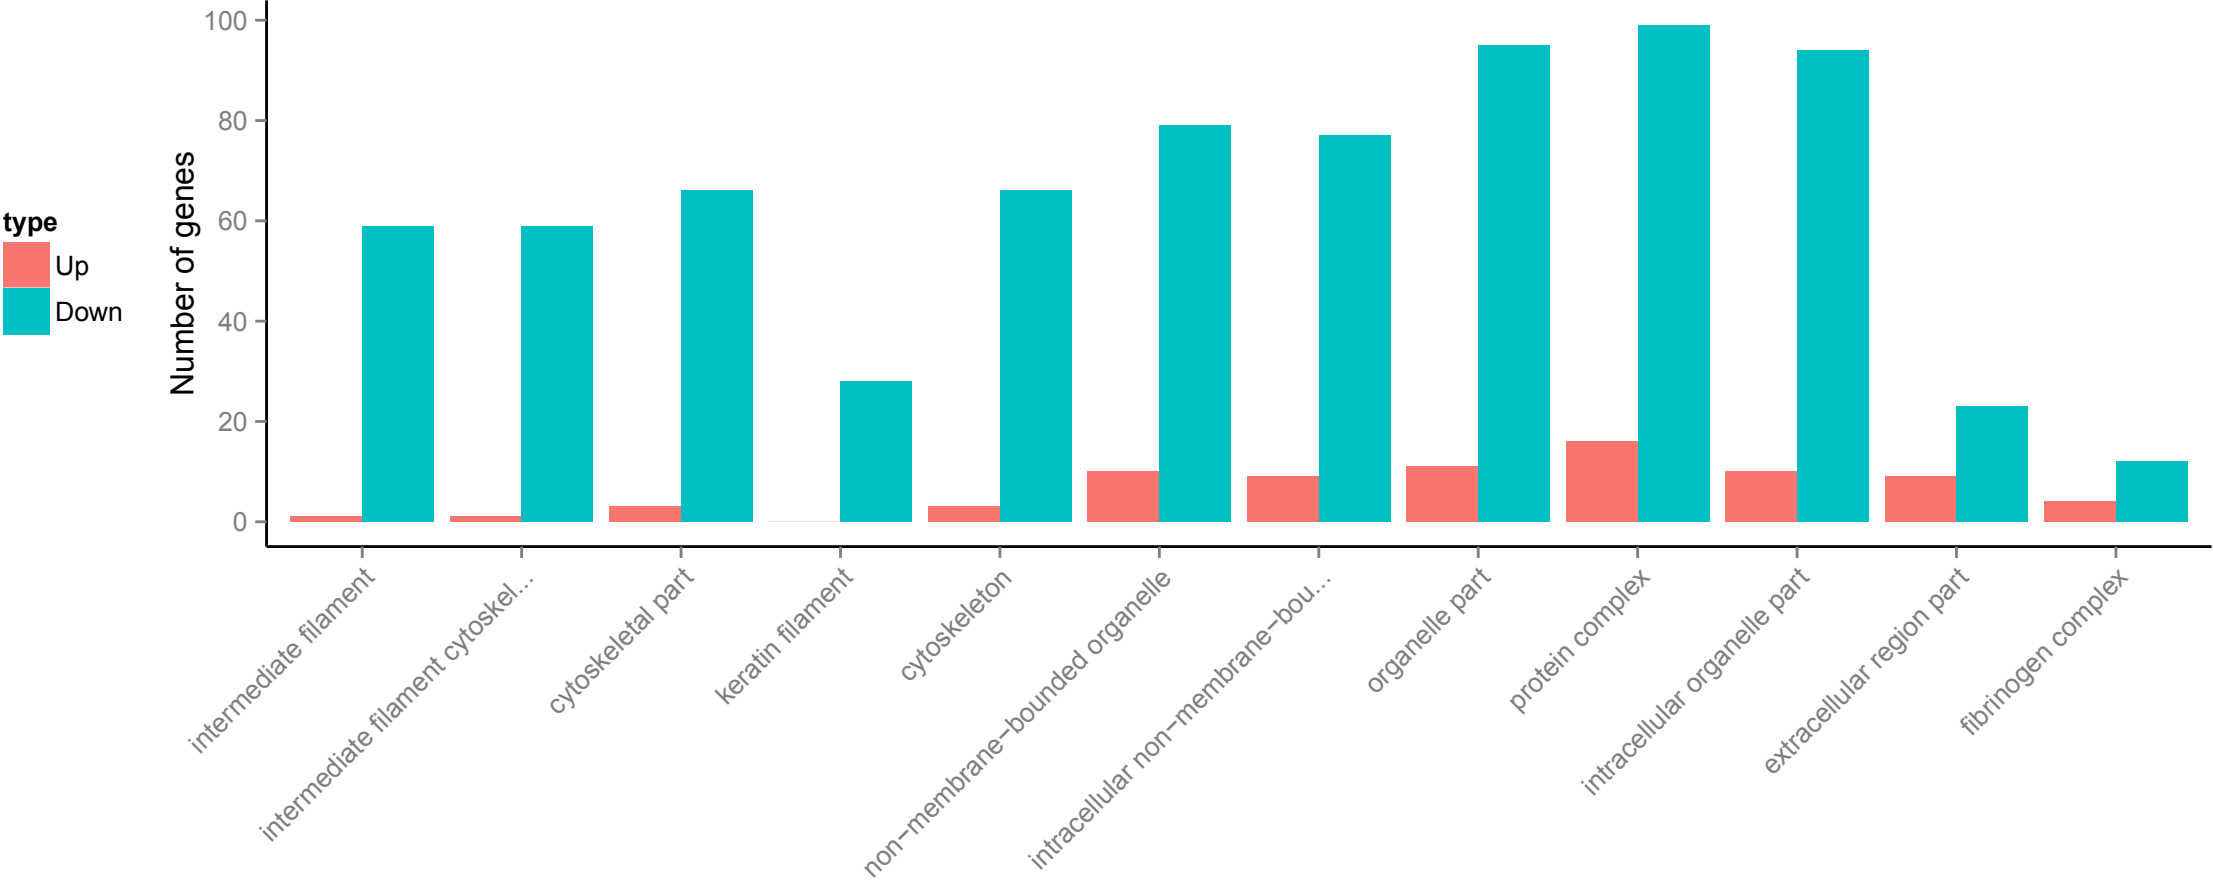

Molecular Function

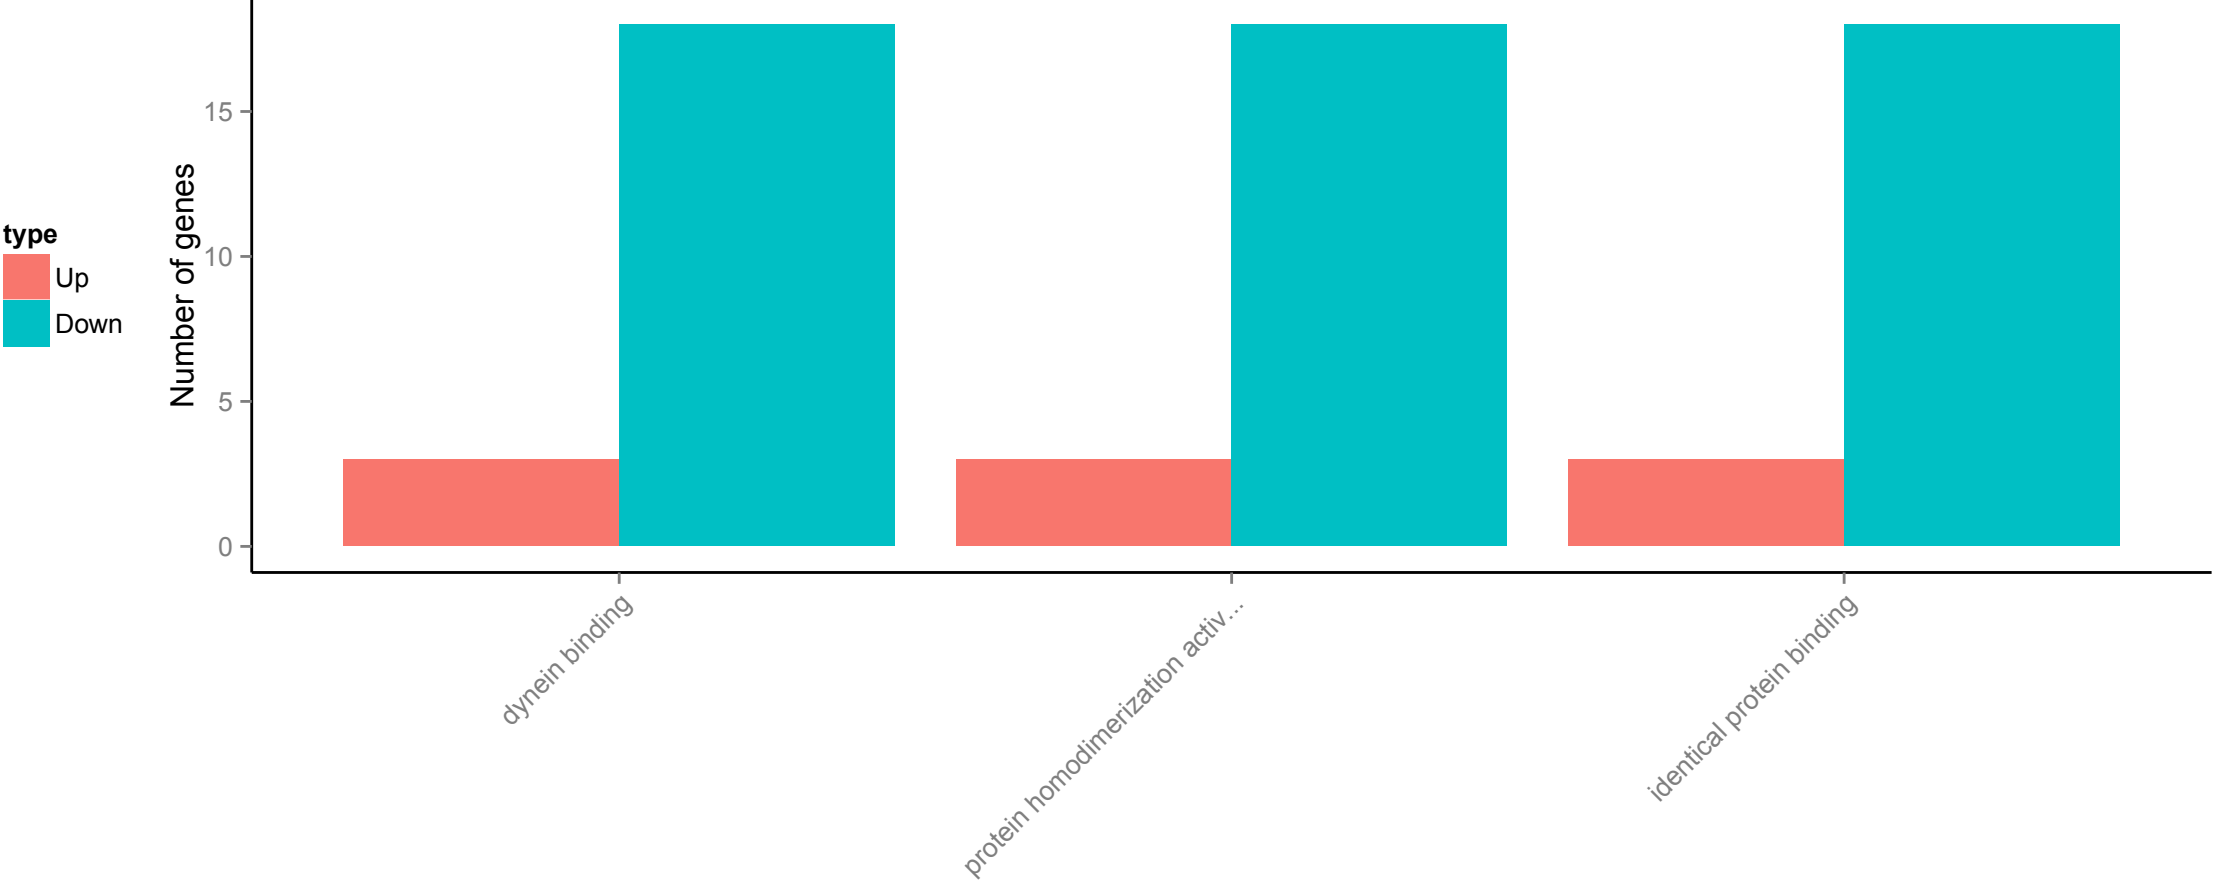

Supplement: Supplementary file 4 [file aab-63-155-2020-supplement.zip]
